**Full Title:** Examining the impact of maternal experiences of domestic violence on adolescent mental health disorders in India

**Short Title:** Maternal experiences of domestic violence and adolescent mental health disorders

**Authors:** Amritha Gourisankar<sup>1,2</sup>, Preethi Ravi<sup>1,2</sup>, Ameeta S. Kalokhe<sup>1,2</sup>, Rachel Waford Hall,<sup>2</sup> Nilakshi Vaidya<sup>4,5</sup>, Eesha Sharma<sup>8</sup>, Bharath Holla<sup>7</sup>, Debasish Basu<sup>19</sup>, Rose Dawn Bharath<sup>9</sup>, Amit Chakrabarti<sup>10</sup>, Sylvane Desrivieres<sup>11</sup>, Matthew Hickman<sup>12</sup>, Kamakshi Kartik<sup>3</sup>, Krishnaveni Ghattu<sup>13</sup>, Kumaran Kalyanaraman<sup>13</sup>, Rebecca Kuriyan<sup>14</sup>, Pratima Murthy<sup>7</sup>, Dimitri Papadopoulos Orfanos<sup>16</sup>, Meera Purushottam<sup>15</sup>, Sunita Simon Kurpad<sup>17</sup>, Rajkumar Lenin Singh<sup>18</sup>, Roshan Lourembam Singh<sup>18</sup>, Bhagyalakshmi Nanjayya Subodh<sup>19</sup>, Mireille B Toledano<sup>20</sup>, Vivek Benegal<sup>4</sup>, Gunter Schumann<sup>5,6</sup>, Kartik Kalyanram<sup>3</sup>; cVEDA Consortium

1. Emory University School of Medicine, Atlanta, USA
2. Emory Rollins School of Public Health, Atlanta, USA
3. Rishi Valley Rural Health Center, Madanapalle, India
4. Centre for Addiction Medicine, National Institute of Mental Health and Neurosciences, Bangalore, India
5. Centre for Population Neuroscience and Precision Medicine (PONS), Dept. of Psychiatry and Neuroscience, Charité Universitätsmedizin Berlin, Germany
6. Institute for Science and Technology of Brain-inspired Intelligence (ISTBI), Fudan University, Shanghai, China
7. Department of Psychiatry, National Institute of Mental Health and Neurosciences, Bangalore, India
8. Department of Child & Adolescent Psychiatry, National Institute of Mental Health and Neurosciences, Bangalore, India
9. Department of Neuroimaging and Interventional Radiology, National Institute of Mental Health and Neurosciences, Bangalore, India
10. ICMR-Centre for Ageing and Mental Health, Kolkata, India
11. Centre for Population Neuroscience and Precision Medicine, MRC Social, Genetic, Developmental Psychiatry Centre, Institute of Psychology, Psychiatry & Neuroscience, King's College London, London, UK
12. Bristol Medical School, University of Bristol, Bristol, UK
13. Epidemiology Research Unit, CSI Holdsworth Memorial Hospital, Mysore, India
14. Division of Nutrition, St John's Research Institute, Bangalore, India
15. Molecular Genetics Laboratory, National Institute of Mental Health and Neurosciences, Bangalore, India
16. NeuroSpin, CEA, Université Paris-Saclay, Paris, France
17. Department of Psychiatry & Department of Medical Ethics, St. John's Medical College & Hospital, Bangalore, India
18. Department of Psychiatry, Regional Institute of Medical Sciences, Imphal, Manipur, India
19. Department of Psychiatry, Postgraduate Institute of Medical Education & Research, Chandigarh, India
20. MRC Centre for Environment and Health, School of Public Health, Imperial College London, London, UK

## Abstract

**Background:** Domestic violence (DV) is experienced by one in three women in India and is linked to poor mental health outcomes. We hypothesize that maternal experiences of DV can have negative impacts on the mental health of their children. Previous studies have demonstrated this link in Western countries, however culturally specific manifestations of DV and mental health disorders and socio-cultural differences in parent-child relationships and home environments necessitate deeper understanding of the impacts of maternal experiences of DV on children in the Indian context.

**Methods:** This study presents a secondary analysis of data collected from a seven-center study in urban and rural India examining mental health disorders among adolescents aged 12-17 years and psychological, physical, and sexual abuse affecting their mothers. The Indian Family Violence and Control Scale (IFVCS) was used to examine experiences of DV among mothers and the Mini International Neuropsychiatric Interview–Kid (MINI-Kid) was used to examine mental health outcomes among adolescents. Multivariate analyses examined the associations between maternal DV and adolescent mental disorders.

**Results:** Data from 2,784 adolescent-mother pairs were analyzed. In bivariate analyses, maternal experiences of physical, psychological, and sexual abuse were significantly associated with adolescent common mental disorders including anxiety and depression ( $p < 0.05$ ). After adjusting for adolescent gender, site, and education status in the multivariate analysis, physical, sexual, and any DV were significantly associated with adolescent anxiety disorders and common mental disorders. Physical abuse was significantly associated with adolescent depressive disorders.

**Conclusions:** These results suggest that exposure to maternal DV significantly impacts adolescent mental health in India and underscore the need to develop trauma-informed school programs and enhance DV prevention for women in India.

## Introduction

Domestic violence (DV), including physical, sexual, and emotional violence, is experienced by approximately 1 in 3 women in India [1]. Women in India who experience DV are more likely to be diagnosed with anxiety, depression, PTSD, suicidality, or fall in the broader category of having a common mental disorder (CMD), which includes anxiety and depressive disorders [2, 3]. CMDs among women experiencing DV are associated with greater reporting of gynecological symptoms such as dyspareunia or menstrual cramps [4]. Studies in India also indicate that lifetime experiences of DV are associated with adverse reproductive outcomes including miscarriage, stillbirth, preterm birth, and complications during labor [5,6]. Maternal experiences of DV are also associated with adverse health outcomes in children including malnutrition, stunted growth, and asthma [7,8,9]. They have also been linked to emotional, behavioral, and academic difficulties among children in India [10,11]. Despite these associations, however, there remain gaps in knowledge related to the impact of maternal experiences of DV on the mental health outcomes of children, including common mental disorders (e.g., depression, anxiety), externalizing disorders (e.g., attention deficit/hyperactivity disorder), and suicidality in the Indian context.

Evidence from other countries suggests that maternal experiences of DV are associated with poor mental health outcomes among children. In the United States, for example, Fredland et al. demonstrated associations between maternal experiences of DV and poor maternal mental health; poor maternal mental health, in turn, predicted symptoms of depression and aggression in children [12]. Children exposed to maternal experiences of DV are also more likely to demonstrate symptoms characteristic of conduct disorders, in addition to clinically

significant internalizing and externalizing behaviors [13,14,15,16]. In multiple Western countries, exposure to maternal experiences of DV during childhood has been shown to be associated with the development of post-traumatic stress disorder (PTSD), oppositional defiant disorder (ODD), anxiety disorders, and major depressive disorder (MDD) in adolescence and young adulthood [17,18,19,20]. These findings have also been replicated in multiple low and middle-income countries, where exposure to DV is typically associated with even higher prevalences of suicidal behavior, substance use, and mental disorders including PTSD and MDD in children [21].

In the Indian context, the impact of maternal experiences of DV on the development of mental disorders in children warrants further investigation. In India, for example, joint family structures (wherein women often live with their husbands' parents and other family members after marriage) are pervasive. Such family structures enable members of the in-law families to serve as key support systems for women, but also enable perpetration of DV either directly or indirectly via influence on a male spouse. Other manifestations of DV specific to the Indian context include perpetration of emotional violence by forcibly sending women to their parental homes, perpetration of physical violence through the use of readily available items (e.g., stones, chemicals that cause burns), and the withholding of contraception until male children are born as a means of control [22,23,24,25]. Mental health disorders may also present in culturally specific ways, including the presence of somatic symptoms related to CMDs among Indian women [4].

Adolescence is a critical developmental period during which milestones related to cognition, social learning, and personality are achieved, and during which psychopathology may

manifest [26,27]. Conduct disorders and ADHD typically peak during adolescence, and depression and anxiety often first manifest at this stage [30,31]. Adolescence may also be a period during which individuals are vulnerable to the effects of exposure to maternal DV, among other adverse childhood experiences (ACEs). The effects of ACEs broadly have been associated with chronic diseases and psychological disorders that may present in childhood, adolescence, or later adulthood [32,33]. Support services for children exposed to domestic violence (e.g., school-based interventions) may be effective in reducing mental health disorders, however, these services may be limited in certain regions, including rural parts of India [28,29].

Therefore, we proposed to examine the association between experiences of maternal DV and mental disorders among paired adolescent children in India. We hypothesized that experiences of maternal DV would be associated with increased mental health symptoms among corresponding adolescents. Given the high burden of DV on women of childbearing age in India, in addition to the prevalence of mental disorders among children, characterizing this relationship is especially critical. The identification of the type of DV exposure on specific mental health disorders among adolescents can be utilized to design culturally-tailored screening and preventive mental health interventions for adolescents exposed to maternal DV and help prioritize DV prevention efforts among mothers.

## Methods

### Introduction

This study employs secondary analysis of data collected from the multi-center study,

*Consortium on Vulnerability to Externalizing Disorders and Addiction (cVEDA), India*

(<https://cveda.org>). The cVEDA study was a longitudinal cohort study of mothers and children across seven health facilities in India that aimed to identify risk and resilience factors affecting the development of mental health disorders in children, adolescents, and young adults. The study utilized an observational cohort design with data collection at baseline, in addition to follow-up data collection 1 and 2 years later for specific measures.

The secondary data analysis conducted in this study involves the subset of the cVEDA cohort which is comprised of children aged 12-17 years at the time of baseline data collection (also known as the C2 cohort). The C2 cohort was specifically selected as children 12-17 were determined to be most likely to witness and understand household violence, compared with the C1 cohort comprised of children aged 6-12 who may not understand specific dimensions of household violence (e.g., psychological abuse) and the C3 cohort comprised of young adults aged 18-23 who may not be living in the household, and therefore may not be exposed to household violence.

### Population and Sample

The study was conducted at seven culturally, socioeconomically, and geographically diverse sites across six states in India and utilized convenience sampling to identify mother-child pairs. More information on the sites can be found in the cVEDA study protocol [34]. Recruitment utilized local schools and hospitals as gatekeepers, in addition to snowballing techniques to capitalize upon the networks of participants. The study included a battery of questionnaires related to sociodemographic information, environmental exposures, psychosocial and personality characteristics, school climate, technology use, food habits, temperament, adverse experiences of the child, medical history of the child and family,

pregnancy history of the mother, and experiences of DV of the mother. Additional details related to study sampling techniques and study population at each site can be found in the published cVEDA study protocol [34].

Although the analysis presented here is limited to children aged 12-17, the inclusion criteria for the parent study included: parents with children aged 6-23 years, who provided informed consent and were able to complete the necessary verbal assessments and neuropsychiatric testing. Exclusion criteria included refusal of consent or inability to complete assessments, and/or legal blindness or deafness, active seizure disorder, or severe physical or active mental illness. Only one child per family was enrolled in the study.

## Instruments

The primary predictor, maternal experiences of DV, was measured using the Indian Family Violence and Control Scale, a culturally specific 63-item instrument which is used to examine experiences of control and physical, psychological, and sexual abuse among married Indian women by their husbands and families-in law [35]. The primary outcomes, common mental health disorders in the paired children, were assessed using the Mini-International Neuropsychiatric Interview for Kids, or MINI-Kid. This instrument screens for psychiatric disorders as defined by the DSM-IV, in children and adolescents aged 6-17 years [36]. The psychiatric disorders analyzed in the study, screened for by MINI-Kid include: depressive disorders (i.e., major depressive disorder (MDD) and dysthymia), anxiety disorders (i.e., social phobia, specific phobias, panic disorder, generalized anxiety disorder (GAD), and post-traumatic stress disorder (PTSD)), suicidal ideation, and externalizing disorders (i.e., attention deficit-hyperactivity disorder (ADHD), conduct disorder, and oppositional defiant disorder (ODD)). The

MINI-Kid also screened for substance use disorder, obsessive-compulsive disorder (OCD), and psychotic disorders including schizophrenia.

We examined adverse child events and demographics as potential confounders. The Adverse Childhood Experiences – International Questionnaire (ACE-IQ) is a survey designed to measure the number and types of experiences related to abuse and household dysfunction (e.g., parental drug use) that children are exposed to in their household and/or community. Based on a version developed in the United States, the International Questionnaire aims to characterize ACEs across on a global scale, and includes questions related to household violence (e.g., yelling, beating) and broader, community-level violence (e.g., military actions, forced migration) [38]. The Socio-Demographic Information and Migration Questionnaire (SDI-M) was adapted from the National Family Health Survey section on household information, and asked specifically about participants’ religion, caste, gender, and educational level, household size and characteristics [1]. The SDI-M also contains questions about members of the household who have migrated and the nature of their work. The Wealth Index was also utilized as a demographic metric. It was developed by the United States Agency for International Development (USAID) Demographic and Health Surveys (DHS) Program, and yields data which is reported in quintiles based on land ownership, ownership of other assets, household construction materials, availability of utilities such as toilets, and other country-specific markers [39].

### Data collection

Surveys were conducted by trained research staff through private face-to-face interviews with mother and child pairs at each study site. The SDI-M, Wealth Index, and MINI-



Kid were administered directly to the child, with the mother present, while the DV questionnaire was administered directly to the mother alone. The ACE-IQ was administered directly to the child alone. The staff members administering the questionnaires were primarily psychologists, along with staff members with certifications in nursing or other health professions. The surveys were translated into the corresponding regional languages and administered in the primary language of the participant. Additional information on the survey process and ethics clearance can be found in the cVEDA study protocol [34].

### Data Analysis

The data was collected using Delosis Psytools (<https://www.delosis.com/>) software, transferred to Microsoft Excel for de-identification and cleaning, and then SPSS Statistics software for data analysis.

### Violence Scale

Three exposure variables were created from each of the subdomains of the IFVCS to measure physical abuse, psychological abuse, and sexual abuse. Each variable had five response options, “Never,” “About Once or Twice in the Past Year,” “About Once a Month,” “About Once a Week,” and “Not in the Past Year but Previously in My Married Life.”

To calculate past-year DV, each variable was analyzed categorically and defined as present if mothers responded affirmatively to *any* of the items within the subscale by endorsing “About Once or Twice in the Past Year,” “About Once a Month,” or “About Once a Week,” and absent if mothers either denied experiencing all items in the subscale, or only endorsed “Not in the Past Year but Previously in My Married Life.” [Mental Health Scale](#)

Five outcome variables were created from the MINI-Kid: 1) depressive disorders, defined as the presence of either major depressive disorder or dysthymia [37], 2) anxiety

disorders, defined by the DSM-V and supporting literature to encompass social phobia, specific phobias, panic disorder, generalized anxiety disorder (GAD), and post-traumatic stress disorder (PTSD) [40,41], and 3) common mental disorders, defined as the combined category of anxiety and depressive disorders [37]. Each of these three outcome variables was initially analyzed categorically in the bivariate analysis and coded as '0' for not meeting the screening criteria for *any* of the included disorders in that category, and '1' for meeting the screening criteria for *at least one* of the included disorders. These five outcome variables were then analyzed as continuous variables, coded based on the range of their score, starting at '0' for not meeting the screening criteria for *any* of the included disorders in that category, and increasing in value depending on the number of disorders they met screening criteria for. The scaled (continuous) variables were ultimately utilized in the bivariate and multivariate results tables, as they better represented the full range and variability of outcomes.

### Descriptive Statistics

Descriptive statistics were first used to examine the demographic characteristics and the distribution of the exposure (maternal experience of DV) and outcome variables (presence of mental health disorder in child).

### Bivariate Analysis

Bivariate analyses utilizing the Chi-square test for independence were conducted to describe the associations between the categorical exposure and outcome variables. A two-tailed alpha of 0.05 was deemed significant for the Chi-square test. The exposure variables were the violence scale variables of psychological, physical, and sexual abuse, and any DV, coded as no or yes ('0' or '1'). The outcome variables were the mental health disorder categories described above, also coded as no or yes.

## Confounding Analysis

Next, a confounding analysis was conducted to identify which of the following demographic variables among the children from the SDI-M (age, household size, education level (less than primary school or greater than primary school), site, gender, location (rural or urban), slum dwelling (no or yes), reserved caste (no or yes), joint family (no or yes), education dropout (no or yes)) and quintile of the household from the Wealth Index were independently associated with both the exposure variables (maternal DV subtypes (physical, psychological, sexual) and any DV) and the outcome variables (mental health conditions of anxiety, depression, and common mental disorders). Additionally, ACEs variables (ACE-IQ binary and ACE-IQ frequency), as measured by the ACE-IQ, were analyzed to determine if they were confounders of the exposure and outcome variables. Binary and frequency refer to two methods of scoring the ACE-IQ tool: the frequency scoring accounts for differences in how often an adverse experience occurred, whereas the binary scoring accounts for whether an adverse experience occurred. Adversity frequency better captured the variability yielded by the ACE-IQ and was therefore utilized in our analyses. In analyses involving the ACE-IQ, we removed three questions that asked about witnessing parental experiences of domestic violence (F6-F8 on the questionnaire) from composite scoring as they were redundant with our exposure variables (from the IFVCS) of parental experiences of DV, and would therefore be redundant and illogical to test for as confounders.

The variables that were significantly associated ( $p < 0.05$ ) with both an exposure variable and an outcome variable were identified as confounders. The identified confounders were gender, site, education dropout (no or yes), adversity binary, and adversity frequency.

## Multivariate Analysis

Lastly, a multivariate analysis using logistic regression was used to examine the association between the various forms of maternal DV experience and anxiety, depression, and common mental disorders, after controlling for ACEs and demographic variables identified as potential confounders. Recognizing that ACEs could be potential confounders or part of a causal pathway, regression models including and excluding ACEs as covariates were run.

## Results

### Description of Results

Data from 2,784 mother-child pairs were utilized in our analysis, with 11.3% recruited from PGIMER, Union Territory, 8.0% from RVRHC, Andhra Pradesh, 33.8% from NIMHANS, Karnataka, 20.2% from SJRI, Karnataka, 14.4% from RIMS, Manipur, 0.7% from CSIHMS, Karnataka, and 11.5% from ICMR-NIOH, West Bengal (see Table 1). The average age of the children was 14 years ( $\sigma = 1.5$  years), and 47% of child participants were female. The average household size was 5 persons ( $\sigma = 2.6$  persons), with 19.1% residing in joint families. Approximately one-third (31.5%) resided in rural areas and 11.1% in slum settlements. 43.8% of the participants were from reserved castes, 5% had dropped out or temporarily discontinued their education, and 1.1% were below a primary school level.

| N = 2784                      |           |
|-------------------------------|-----------|
|                               | Mean (SD) |
| Age (years)                   | 14 (1.5)  |
| Household Size                | 5.1 (2.6) |
|                               | No.       |
| Gender                        |           |
| Female                        | 1290      |
| Location                      |           |
| Rural                         | 863       |
| Residents in Slum Settlements |           |

|                    |                                     |                      |
|--------------------|-------------------------------------|----------------------|
|                    | Yes                                 | 304                  |
| Caste              |                                     |                      |
|                    | Reserved Castes                     | 1174                 |
| Family Structure   |                                     |                      |
|                    | Joint                               | 523                  |
| Education Status   |                                     |                      |
|                    | Dropped Out of School               | 138                  |
| Educational Level  |                                     |                      |
|                    | Below Primary                       | 30                   |
|                    | Primary                             | 204                  |
|                    | Upper Primary/Middle                | 1225                 |
|                    | Secondary                           | 955                  |
|                    | Higher Secondary and Above          | 328                  |
| Site of Enrollment |                                     |                      |
|                    | PGIMER (1), Union Territory         | 314                  |
|                    | RVRHC (2), Andhra Pradesh           | 222                  |
|                    | NIMHANS (3), Karnataka              | 942                  |
|                    | SJRI (4), Karnataka                 | 563                  |
|                    | RIMS (IMPHAL, 5), Manipur           | 402                  |
|                    | CSIHMS (MYSORE, 6), Karnataka       | 20                   |
|                    | ICMR-NIOH (KOLKATA, 7), West Bengal | 321                  |
| Wealth Index       |                                     | <b>N = 3169, (%)</b> |
|                    | Lowest Quintile                     | 564, 12.7            |
|                    | Quintile 2                          | 737, 16.6            |
|                    | Quintile 3                          | 681, 15.3            |
|                    | Quintile 4                          | 580, 13.1            |
|                    | Highest Quintile                    | 607, 13.7            |

*Table 1: Descriptive Statistics about Participants*

Among the adolescents, the prevalence of anxiety disorders was 5.3%, depressive disorders was 3.2%, and CMDs was 7.4%. Among the mothers, the prevalence of any type of DV, in the past year was 36.8% (or 947/2570). The prevalence of past-year physical abuse was 14.5%, past-year psychological abuse was 36.0%, and past-year sexual abuse was 3.9%.

|                               |                         |
|-------------------------------|-------------------------|
| Adolescent Outcome (N = 4437) |                         |
|                               | Anxiety Disorders       |
|                               | 5.4% (147)              |
|                               | Depressive Disorders    |
|                               | 3.5% (96)               |
|                               | Common Mental Disorders |
|                               | 7.5 (206)               |
| Maternal Exposure (N = 4437)  |                         |
|                               | Any DV                  |
|                               | 36.8% (947)             |

|                     |             |
|---------------------|-------------|
| Physical Abuse      | 14.5% (389) |
| Psychological Abuse | 36.0% (965) |
| Sexual Abuse        | 3.9% (100)  |

*Table 2: Prevalence of Anxiety, Depression, and Common Mental Disorders among Adolescents and Prevalence of Maternal Exposure to Any DV, Physical Abuse, Psychological Abuse, and Sexual Abuse*

Past-year physical and sexual abuse, but not psychological abuse nor any DV, were significantly associated with anxiety disorders in the paired children (see Table 3). Significant associations were found between adolescent depressive disorders and past-year physical, psychological, sexual abuse, and any maternal DV experience, and between adolescent common mental disorders and past-year maternal physical and sexual abuse and any DV.

|                     | Anxiety Disorders |                |             | Depressive Disorders |               |             | Common Mental Disorders |                |             |
|---------------------|-------------------|----------------|-------------|----------------------|---------------|-------------|-------------------------|----------------|-------------|
|                     | No<br>N = 2393    | Yes<br>N = 132 | P-<br>Value | No<br>N = 2433       | Yes<br>N = 92 | P-<br>Value | No<br>N = 2336          | Yes<br>N = 189 | P-<br>Value |
| Any DV              | 864<br>(36.1%)    | 56<br>(42.4%)  | .142        | 871<br>(35.8%)       | 49<br>(53.3%) | .001        | 835<br>(35.7%)          | 85<br>(45.0%)  | .011        |
| Physical Abuse      | 352<br>(14.2%)    | 33<br>(23.9%)  | .002        | 356<br>(14.1%)       | 29<br>(31.2%) | .000        | 332<br>(13.7%)          | 53<br>(27.0%)  | .000        |
| Psychological Abuse | 882<br>(35.4%)    | 52<br>(38.2%)  | .504        | 892<br>(35.2%)       | 42<br>(45.7%) | .040        | 856<br>(35.2%)          | 78<br>(40.4%)  | .144        |
| Sexual Abuse        | 88<br>(3.7%)      | 11<br>(8.2%)   | .008        | 90<br>(3.7%)         | 9<br>(9.7%)   | .003        | 84<br>(3.6%)            | 15<br>(7.8%)   | .004        |

*Table 3: Bivariate Analyses of Anxiety, Depressive, and Common Mental Disorders with Past-Year DV*  
Confounders were identified by conducting bivariate analyses of sociodemographic

variables (obtained from the SDI-M), with each of the MINI-Kid and the IFVCS variables. Those that were significantly associated with IFVCS and MINI-kid variables are shown below (see Tables 4). Additionally, any DV was associated with adversity binary and adversity frequency, both of which report outcomes of the ACE-IQ. Adversity binary and frequency were associated with any DV, physical, psychological, and sexual abuse (see Table 5). Both adversity binary and

adversity frequency were associated with anxiety disorders, depressive disorders, and common mental disorders (see Table 5). As a result, adversity binary and adversity frequency were determined to be confounders. With regards to Wealth Index, there is no significant association between Wealth Index quintile and any DV, physical abuse, psychological abuse, or sexual abuse. There is, however, an association between Wealth Index score and both physical and psychological abuse (see Table 6). There is no association between Wealth Index quintile or Wealth Index score and anxiety, depression, or common mental disorders (see Table 6). It is reasonable, therefore, to label Wealth Index score as a confounding variable.

|                         | Physical Violence | Psychological Violence | Sexual Violence | Any DV      | Depressive Disorders | Anxiety Disorders | Common Mental Disorders |
|-------------------------|-------------------|------------------------|-----------------|-------------|----------------------|-------------------|-------------------------|
| Age                     | .246              | .794                   | .775            | .643        | .754                 | .451              | .553                    |
| Household Size          | <b>.004</b>       | <b>.000</b>            | .069            | <b>.000</b> | .792                 | .679              | .067                    |
| Education Group         | .179              | .702                   | .303            | .848        | <b>.010</b>          | .988              | .913                    |
| Site                    | <b>.000</b>       | <b>.000</b>            | <b>.000</b>     | <b>.000</b> | <b>.000</b>          | <b>.000</b>       | <b>.000</b>             |
| Gender                  | .868              | <b>.000</b>            | .096            | <b>.000</b> | <b>.008</b>          | .055              | <b>.008</b>             |
| Rural (Y/N)             | .377              | <b>.000</b>            | .273            | <b>.003</b> | .815                 | .167              | .085                    |
| Slum Dwelling (Y/N)     | <b>.004</b>       | <b>.000</b>            | .130            | <b>.000</b> | .061                 | .964              | .261                    |
| Reserved Caste (Y/N)    | .066              | .654                   | .536            | .430        | .690                 | .660              | .402                    |
| Joint Family (Y/N)      | .089              | <b>.000</b>            | .372            | <b>.002</b> | .562                 | .355              | .165                    |
| Education Dropout (Y/N) | <b>.000</b>       | <b>.000</b>            | <b>.000</b>     | <b>.000</b> | <b>.000</b>          | .263              | <b>.000</b>             |

Table 4: Confounding Analyses of SDI Variables with Exposure and Outcome Variables

|                | Adversity Binary, N = 3146 | Adversity Frequency, N = 3146 |
|----------------|----------------------------|-------------------------------|
|                | P-Value                    | P-Value                       |
| Any DV         | <b>&lt;.001</b>            | <b>&lt;.001</b>               |
| Physical Abuse | <b>&lt;.001</b>            | <b>.021</b>                   |

|                         |                 |                 |
|-------------------------|-----------------|-----------------|
| Psychological Abuse     | <b>&lt;.001</b> | <b>&lt;.001</b> |
| Sexual Abuse            | <b>&lt;.001</b> | <b>&lt;.001</b> |
| Anxiety Disorders       | <b>&lt;.001</b> | <b>&lt;.001</b> |
| Depressive Disorders    | <b>&lt;.001</b> | <b>&lt;.001</b> |
| Common Mental Disorders | <b>&lt;.001</b> | <b>&lt;.001</b> |

Table 5: Confounding Analyses of ACE-IQ Variables with Exposure and Outcome Variables

|                         | Wealth Index Quintile | Wealth Index Score |
|-------------------------|-----------------------|--------------------|
|                         | P-Value               | P-Value            |
| Any DV                  | .179                  | .428               |
| Physical Abuse          | <b>.006</b>           | .123               |
| Psychological Abuse     | <b>.011</b>           | .694               |
| Sexual Abuse            | .413                  | .260               |
| Anxiety Disorders       | .506                  | .538               |
| Depressive Disorders    | .819                  | .700               |
| Common Mental Disorders | .985                  | .753               |

Table 6: Confounding Analyses of Wealth Index Variables with Exposure and Outcome Variables

### Multivariate Analysis Including Confounders:

After determining specific confounders, bivariate analysis demonstrated no significant association between any DV and anxiety disorders. After controlling for site, education status, and gender with or without adversity frequency, maternal DV experience was not significantly associated with anxiety disorder in the paired adolescent (see Table 7).

|                     | Anxiety Disorders | Adjusted Odds Ratio without adversity frequency (95% confidence interval) | Adjusted Odds Ratio with adversity frequency (95% confidence interval) |
|---------------------|-------------------|---------------------------------------------------------------------------|------------------------------------------------------------------------|
| Any DV              | 1.304             | 1.249 (.869, 1.794)                                                       | 1.340 (.810, 2.217)                                                    |
| Site                |                   | <b>1.199 (1.071, 1.342)</b>                                               | <b>1.179 (1.028, 1.353)</b>                                            |
| Education Status    |                   | <b>.401 (.221, .728)</b>                                                  | <b>.398 (.184, .861)</b>                                               |
| Gender              |                   | <b>.484 (.335, .699)</b>                                                  | <b>.417 (.350, .696)</b>                                               |
| Adversity Frequency |                   |                                                                           | <b>.783 (.669, .917)</b>                                               |



*Table 7: Multivariate Analyses of any DV with Anxiety Disorders, adjusted for confounders, bolded if  $p < 0.05$*

Bivariate analysis demonstrated a significant association between any DV and depressive disorders. After controlling for site, education status, and gender, maternal DV experience was significantly associated with depressive disorders. This association did not hold when adversity frequency was added to the model (see Table 8).

|                     | Depressive Disorders | Adjusted Odds Ratio without adversity frequency (95% confidence interval) | Adjusted Odds Ratio with adversity frequency (95% confidence interval) |
|---------------------|----------------------|---------------------------------------------------------------------------|------------------------------------------------------------------------|
| Any DV              | <b>2.044</b>         | <b>1.743 (1.135, 2.675)</b>                                               | .763 (.417, 1.396)                                                     |
| Site                |                      | 1.061 (.933, 1.206)                                                       | 1.021 (.869, 1.200)                                                    |
| Education Status    |                      | <b>.173 (.099, .301)</b>                                                  | .552 (.239, 1.274)                                                     |
| Gender              |                      | <b>.411 (.260, .650)</b>                                                  | <b>.409 (.224, .748)</b>                                               |
| Adversity Frequency |                      |                                                                           | <b>.468 (.394, .556)</b>                                               |

*Table 8: Multivariate Analyses of any DV with Depressive Disorders, adjusted for confounders, bolded if  $p < 0.05$*

Bivariate analysis demonstrated a significant association between common mental disorders and any DV, but after controlling for site, education status, and gender, maternal DV was no longer associated with CMDs, with or without adversity frequency included in the analysis. There are significant associations between common mental disorders and site (without inclusion of adversity frequency only), education status (with or without inclusion of adversity frequency), gender (with and without inclusion of adversity frequency), and adversity frequency in the multivariate analysis (see Table 9).

|                  | Common Mental Disorders | Adjusted Odds Ratio without adversity frequency (95% confidence interval) | Adjusted Odds Ratio with adversity frequency (95% confidence interval) |
|------------------|-------------------------|---------------------------------------------------------------------------|------------------------------------------------------------------------|
| Any DV           | <b>1.469</b>            | 1.351 (.994, 1.835)                                                       | 1.034 (.674, 1.588)                                                    |
| Site             |                         | <b>1.128 (1.027, 1.238)</b>                                               | 1.097 (.978, 1.230)                                                    |
| Education Status |                         | <b>.276 (.173, .441)</b>                                                  | <b>.457 (.237, .879)</b>                                               |
| Gender           |                         | <b>.532 (.389, .727)</b>                                                  | <b>.464 (.301, .714)</b>                                               |

|                     |  |                          |
|---------------------|--|--------------------------|
| Adversity Frequency |  | <b>.626 (.549, .714)</b> |
|---------------------|--|--------------------------|

*Table 9: Multivariate Analyses of any DV with Common Mental Disorders, adjusted for confounders, bolded if  $p < 0.05$*

Analyses controlling for site, education dropout status and gender with or without adversity frequency for the association between each of the subtypes of DV and mental disorders are listed in the appendix. In multivariate analyses, physical abuse was significantly correlated with anxiety disorders (OR = 1.8), depressive disorders (OR = 2.3), and common mental disorders (OR = 2.1), when adversity frequency was not included as a confounder. All these associations were no longer significant when adversity frequency was included in the analysis as a confounder. Additionally, sexual abuse was significantly associated with anxiety disorders (OR = 2.1) and common mental disorders (OR = 1.9) when adversity frequency was not included as a confounder; however, these associations were no longer significant when adversity frequency was included as a confounder. In all analyses, site, education dropout status, and gender were included as confounders. Gender was significantly associated with exposure and outcome variables in all regression analyses. With regards to the associations between physical abuse and common mental disorders, anxiety disorders; sexual abuse and common mental disorders, anxiety disorders, the site, education dropout status and gender confounders were all significantly associated with both exposure and outcome variables. Finally, in the association between physical abuse and depressive disorders, only education status and gender were significantly associated with both exposure and outcome—site was not a confounder.

## Discussion

The high burden of DV among women, the prevalence of mental disorders among adolescents, and the known negative impacts of DV on maternal mental health and children's overall health in India necessitated further examination of the impact of maternal experiences of DV on adolescent mental health in the Indian context [2,3]. This is further affirmed by studies from around the world that demonstrate links between maternal experiences of DV and the development of mental disorders among adolescents [20]. This study addresses this issue, and stems from the first large-scale interstate data collection on mental health disorders and their correlates in India, and encompasses diverse rural and urban sites including hospitals, schools, and community health centers [42].

The results of the bivariate analysis suggest that maternal experiences of past-year physical, psychological, and sexual abuse are associated with higher rates of anxiety and depression in Indian adolescents. Depressive disorders specifically were associated with physical, psychological, and sexual abuse, while anxiety disorders were associated only with physical and sexual abuse. One potential explanation for these results is that although the C2 cohort age group (12-17 years) was selected because they were thought to have greater awareness and understanding of violence (including psychological abuse) in the home, than their younger counterparts (6-12 years), they still may not have been aware of the presence of control-related factors including restricted ability to leave the house to see family or friends, or use the phone to talk with family or friends. This finding is interesting considering the association between maternal experiences of psychological violence and adolescent depression. Psychological violence included verbal threats and harassment, and deprivation of

resources, which may have been more noticeable to children in the household. Adversity binary and adversity frequency, site, gender (female or male), and education dropout status (no or yes) were found to be confounders in the association between maternal experiences of DV and adolescent anxiety and depressive disorders, whereas Wealth Index (as reported by quintile and score) was not a confounder. It is not unexpected that adversity binary and adversity frequency are confounders of this association, however, removing the overlapping questions related to household violence in the ACE-IQ (F6-F8) should have reduced redundancy between ACE-IQ and IFVCS. It is not clear, therefore, whether adversity frequency is a true confounder or, rather, a variable that lies along the causal pathway between maternal experiences of DV and adolescent mental health. It could be that maternal experiences of violence lead to increased ACEs, including neglect by parents or displacement of violence onto children, which leads to poorer adolescent mental health outcomes. Gender, additionally, is a relevant confounder, as it suggests that maternal experiences of DV may not be directly impacting female adolescents' mental health, despite increased rates of adverse mental health outcomes among female adolescents. Other factors (e.g., gender norms, substance use in the household), instead, could be influencing the association between maternal experiences of DV and mental health outcomes among female adolescents, existing on causal pathways that may differ from the one under consideration. The increased rates of adverse mental health outcomes in those who had dropped out of school suggest that contextual factors that influence whether adolescents stay in school, including poverty and an increased need for children in the household to earn wages, are related to both household violence and poorer adolescent mental health. Lastly, site as a confounder could potentially reflect a number of different aspects of

study recruitment and design. First, the study sites were very diverse. For example, the Rishi Valley Rural Health Centre is a primary care clinic in a rural area and participants at this site were predominantly recruited from schools in the area, in addition to children of adult patients of the clinic or children who were patients themselves. NIMHANS, alternatively, is a major mental health hospital in a large urban area, where patients or children of patients were recruited to be study participants. Additional differences in demographics (of both mothers and children) and mental health disorder prevalences amongst participants and their family members could also potentially be reflected in site's ultimate status as a confounder.

The results of the multivariate analysis suggest that physical abuse is correlated with anxiety, depressive disorders, and common mental disorders when controlling for confounders, underscoring the consistent impact that witnessing maternal DV has on adolescents. The odds of having a mother who experienced DV (particularly physical or sexual abuse) were twice as high among adolescents with anxiety, depression or common mental disorders, when controlling for gender, education dropout status, and site. Interestingly, sexual abuse was correlated with anxiety and common mental disorders, although not depressive disorders. While the cause for these differences in association is not clear, they do allude to how types of household violence unwitnessed by children can still impact their mental health. This association may also be reflected in the pattern noted by study interviewers regarding the progressive nature of abuse (i.e., psychological abuse and control were more common, and physical and sexual abuse were less common in the initial years of marriage, but physical and sexual abuse were typically associated with a continuation or escalation of violence in the later years of a marriage). Households in which sexual abuse is occurring, therefore, may be

households that have had more violence, for more years, with a cumulative effect on the mental health of adolescents in the home.

Overall, the associations between maternal DV and adolescent anxiety, depressive disorders, and common mental disorders parallel studies in Western countries that demonstrate similar associations [43,44]. Our findings serve to corroborate the association between exposure to DV and depression in adolescents demonstrated in other low and middle-income countries [21].

## Limitations

A potential limitation of this study is the four-hour battery of surveys utilized, which may have contributed to participant fatigue and decreased reliability of responses. We also relied on a convenience sampling strategy which reduces the generalizability of our findings. Another notable aspect of the study design is the variability between sites, which yielded a large and diverse sample which we consider a strength of our study; however, different types of sites (e.g., mental health hospitals, primary care centers, university hospitals, schools) may have contributed to site's ultimate determination as a confounding factor in our analysis. Additionally, our analysis did not examine all potential confounders identified in the literature, like family history of mental health disorders and parental substance abuse, as these were not captured in the parent study.

## Conclusions

In conclusion, our findings collectively suggest that maternal DV experience is associated with mental health disorders including anxiety and depression in adolescents in India. Future studies should validate these findings, and independently examine the impact of maternal DV

on individual mental disorders, while additionally controlling for parental mental health history, parental history of substance use, parental education level, and site characteristics that were not considered in our analysis. Qualitative studies should investigate the mechanisms by which maternal DV is linked to mental health disorders in paired adolescent children. Further, our findings underscore the need for programming and policy interventions targeted at maternal DV prevention in the context of promoting good mental health among children. Interventions in Indian schools and hospitals to screen for and address adolescent exposure to maternal DV could be employed to mitigate the risk of development of mental health disorders, or detect and treat existing mental health disorders. Additionally, interventions related to education for parents— elucidating the potential effects of maternal experiences of DV on children’s mental health— and teachers— outlining potential signs of mental illness, exposure to maternal DV in the home, and providing training on trauma-sensitive teaching— may be of utility to address the burden of maternal DV exposure on children.

## Acknowledgements

Thank you to the entire staff at the RVRHC, particularly Geeta, Sujatha, Aruna, and Prasunna, without whom the data collection would not have been possible. Sincere thanks to all the women and children who shared their time and personal experiences for this study.

## References

1. International Institute for Population Sciences (IIPS), I. (2017). *National Family Health Survey (NFHS-4), 2015-16: India*. Retrieved from Mumbai: IIPS:
2. Chandra, P. S., Satyanarayana, V. A., & Carey, M. P. (2009). Women reporting intimate partner violence in India: associations with PTSD and depressive symptoms. *Arch Womens Ment Health*, 12(4), 203-209. doi:10.1007/s00737-009-0065-6
3. Vizcarra, B., Hassan, F., Hunter, W. M., Muñoz, S. R., Ramiro, L., & De Paula, C. S. (2004). Partner violence as a risk factor for mental health among women from communities in the Philippines,

Egypt, Chile, and India. *Injury Control & Safety Promotion*, 11(2), 125.

doi:10.1080/15660970412331292351

4. Patel, V., Kirkwood Br Fau - Pednekar, S., Pednekar S Fau - Pereira, B., Pereira B Fau - Barros, P., Barros P Fau - Fernandes, J., Fernandes J Fau - Datta, J., . . . Mabey, D. (2006). Gender disadvantage and reproductive health risk factors for common mental disorders in women: a community survey in India. (0003-990X (Print)).
5. Dhar, D., McDougal, L., Hay, K., Atmavilas, Y., Silverman, J., Triplett, D., & Raj, A. (2018). Associations between intimate partner violence and reproductive and maternal health outcomes in Bihar, India: a cross-sectional study. (1742-4755 (Electronic)).
6. Rao, D., Kumar, S., Mohanraj, R., Frey, S., Manhart, L. E., & D, L. K. (2016). The impact of domestic violence and depressive symptoms on preterm birth in South India. (1433-9285 (Electronic)).
7. Bair-Merriitt, M. H., Voegtline, K., Ghazarian, S. R., Granger, D. A., Blair, C., & Johnson, S. B. (2015). Maternal intimate partner violence exposure, child cortisol reactivity and child asthma. (1873-7757 (Electronic)).
8. Neamah, H. H., Sudfeld, C., McCoy, D. C., Fink, G., Fawzi, W. W., Masanja, H., . . . Smith Fawzi, M. C. (2018). Intimate Partner Violence, Depression, and Child Growth and Development. LID - e20173457 [pii] LID - 10.1542/peds.2017-3457 [doi]. (1098-4275 (Electronic)).
9. Ziaei, S., Naved, R. T., & Ekström, E.-C. (2014). Women's exposure to intimate partner violence and child malnutrition: findings from demographic and health surveys in Bangladesh. *Maternal & child nutrition*, 10(3), 347-359. doi:10.1111/j.1740-8709.2012.00432.x
10. Deb, S., Ray, M., Bhattacharyya, B., & Sun, J. (2016). Violence against the adolescents of Kolkata: A study in relation to the socio-economic background and mental health. *Asian Journal of Psychiatry*, 19, 4-13. doi:<https://doi.org/10.1016/j.ajp.2015.11.003>
11. Satyanarayana, V. A., Hebbani, S., Hegde, S., Krishnan, S., & Srinivasan, K. (2015). Two sides of a coin: Perpetrators and survivors perspectives on the triad of alcohol, intimate partner violence and mental health in South India. *Asian Journal of Psychiatry*, 15, 38-43. doi:<https://doi.org/10.1016/j.ajp.2015.04.014>
12. Fredland, N., Symes, L., Gilroy, H., Paulson, R., Nava, A., McFarlane, J., & Pennings, J. (2015). Connecting Partner Violence to Poor Functioning for Mothers and Children: Modeling Intergenerational Outcomes. *Journal of Family Violence*, 30(5), 555-566. doi:10.1007/s10896-015-9702-1
13. Ehrensaft, M. K., & Cohen, P. (2012). Contribution of Family Violence to the Intergenerational Transmission of Externalizing Behavior. *Prevention Science*, 13(4), 370-383. doi:10.1007/s11121-011-0223-8
14. Kernic, M. A., Wolf, M. E., Holt, V. L., McKnight, B., Huebner, C. E., & Rivara, F. P. (2003). Behavioral problems among children whose mothers are abused by an intimate partner. *Child Abuse Negl*, 27(11), 1231-1246. doi:10.1016/j.chiabu.2002.12.001
15. Meltzer, H., Doos, L., Vostanis, P., Ford, T., Goodman, R. (2009). The mental health of children who witness domestic violence. *Child & Family Social Work*, 14, 491-501.
16. Turner, H. A., Finkelhor, D., & Ormrod, R. (2006). The effect of lifetime victimization on the mental health of children and adolescents. *Soc Sci Med*, 62(1), 13-27. doi:10.1016/j.socscimed.2005.05.030



17. Forsstrom-Cohen, B. R., Alan. (1985). The Effects of Parental Marital Violence on Young Adults: An Exploratory Investigation. *Journal of Marriage and Family*, 47, 467-472. doi:10.2307/352145
18. Pelcovitz, D., Kaplan, S. J., DeRosa, R. R., Mandel, F. S., & Salzinger, S. (2000). Psychiatric Disorders in Adolescents Exposed to Domestic Violence and Physical Abuse. *American Journal of Orthopsychiatry*, 70(3), 360-369. doi:10.1037/h0087668
19. Russell, D., Springer, K. W., & Greenfield, E. A. (2010). Witnessing domestic abuse in childhood as an independent risk factor for depressive symptoms in young adulthood. *Child Abuse & Neglect*, 34(6), 448-453. doi:10.1016/j.chiabu.2009.10.004
20. Zinzow, H. M., Ruggiero, K. J., Resnick, H., Hanson, R., Smith, D., Saunders, B., & Kilpatrick, D. (2009). Prevalence and mental health correlates of witnessed parental and community violence in a national sample of adolescents. *J Child Psychol Psychiatry*, 50(4), 441-450. doi:10.1111/j.1469-7610.2008.02004.x
21. Ribeiro, W. S., Andreoli, S. B., Ferri, C. P., Prince, M., & Mari, J. J. (2009). [Exposure to violence and mental health problems in low and middle-income countries: a literature review]. *Braz J Psychiatry*, 31 Suppl 2, S49-57. doi:10.1590/s1516-44462009000600003
22. Kalokhe, A. S., Potdar, R. R., Stephenson, R., Dunkle, K. L., Paranjape, A., del Rio, C., & Sahay, S. (2015). How Well Does the World Health Organization Definition of Domestic Violence Work for India? *PLoS One*, 10(3), e0120909. doi:10.1371/journal.pone.0120909
23. Natarajan, M. (2014). Differences between intentional and non-intentional burns in India: implications for prevention. *Burns*, 40(5), 1033-1039. doi:10.1016/j.burns.2013.12.002
24. Rao, V. (1997). Wife-beating in rural South India: A qualitative and econometric analysis. *Social Science & Medicine*, 44(8), 1169-1180. doi:[https://doi.org/10.1016/S0277-9536\(96\)00252-3](https://doi.org/10.1016/S0277-9536(96)00252-3)
25. Spiwak, R., Logsetty, S., Afifi, T. O., & Sareen, J. (2015). Severe partner perpetrated burn: Examining a nationally representative sample of women in India. *Burns*, 41(8), 1847-1854. doi:<https://doi.org/10.1016/j.burns.2015.08.035>
26. DelGiudice, M. (2018). Middle Childhood: An Evolutionary-Developmental Synthesis. In N. Halfon, C. B. Forrest, R. M. Lerner, & E. M. Faustman (Eds.), *Handbook of Life Course Health Development* (pp. 95-107). Cham: Springer International Publishing.
27. Jaworska, N., & MacQueen, G. (2015). Adolescence as a unique developmental period. *Journal of psychiatry & neuroscience : JPN*, 40(5), 291-293. doi:10.1503/jpn.150268
28. Parikh, R., Michelson, D., Sapru, M., Sahu, R., Singh, A., Cuijpers, P., & Patel, V. (2019). Priorities and preferences for school-based mental health services in India: a multi-stakeholder study with adolescents, parents, school staff, and mental health providers. *Global Mental Health*, 6, e18. doi:10.1017/gmh.2019.16
29. Thompson, E. H., & Trice-Black, S. (2012). School-Based Group Interventions for Children Exposed to Domestic Violence. *Journal of Family Violence*, 27(3), 233-241. doi:10.1007/s10896-012-9416-6
30. Paus, T., Keshavan, M., & Giedd, J. N. (2008). Why do many psychiatric disorders emerge during adolescence? *Nat Rev Neurosci*, 9(12), 947-957. doi:10.1038/nrn2513
31. Sagar, R., Dandona, R., Gururaj, G., Dhaliwal, R. S., Singh, A., Ferrari, A., . . . Dandona, L. (2020). The burden of mental disorders across the states of India: the Global Burden of Disease Study 1990–2017. *The Lancet Psychiatry*, 7(2), 148-161. doi:10.1016/S2215-0366(19)30475-4
32. Felitti, V. J., Anda, R. F., Nordenberg, D., Williamson, D. F., Spitz, A. M., Edwards, V., Koss, M. P., & Marks, J. S. (1998). Relationship of childhood abuse and household dysfunction to many of the

- leading causes of death in adults. The Adverse Childhood Experiences (ACE) Study. *American journal of preventive medicine*, 14(4), 245–258. [https://doi.org/10.1016/s0749-3797\(98\)00017-8](https://doi.org/10.1016/s0749-3797(98)00017-8)
33. Shonkoff, J. P., Garner, A. S., Committee on Psychosocial Aspects of Child and Family Health, Committee on Early Childhood, Adoption, and Dependent Care, & Section on Developmental and Behavioral Pediatrics (2012). The lifelong effects of early childhood adversity and toxic stress. *Pediatrics*, 129(1), e232–e246. <https://doi.org/10.1542/peds.2011-2663>
34. Sharma, E., Vaidya, N., Iyengar, U., Zhang, Y., Holla, B., Purushottam, M., . . . c, V. C. (2020). Consortium on Vulnerability to Externalizing Disorders and Addictions (cVEDA): A developmental cohort study protocol. *BMC psychiatry*, 20(1), 2-2. doi:10.1186/s12888-019-2373-3
35. Kalokhe, A. S., Stephenson, R., Kelley, M. E., Dunkle, K. L., Paranjape, A., Solas, V., . . . Sahay, S. (2016). The Development and Validation of the Indian Family Violence and Control Scale. *PLoS One*, 11(1), e0148120. doi:10.1371/journal.pone.0148120
36. Sheehan, D. V., Sheehan, K. H., Shytte, R. D., Janavs, J., Bannon, Y., Rogers, J. E., . . . Wilkinson, B. (2010). Reliability and validity of the Mini International Neuropsychiatric Interview for Children and Adolescents (MINI-KID). *The Journal of Clinical Psychiatry*, 71(3), 313-326. doi:10.4088/JCP.09m05305whi
37. World Health Organization. Adverse Childhood Experiences International Questionnaire. In Adverse Childhood Experiences International Questionnaire (ACE-IQ). [website]: Geneva: WHO, 2018.
38. World Health Organization. (2017). Depression and Other Common Mental Disorders: Global Health Estimates ( Licence: CC BY-NC-SA 3.0 IGO). Retrieved from Geneva:
39. Rutstein, Shea & Johnson, Kiersten. (2004). The DHS Wealth Index. 10.13140/2.1.2806.4809.
40. Kupfer, D. J. (2015). Anxiety and DSM-5. *Dialogues in clinical neuroscience*, 17(3), 245-246. Retrieved from <https://pubmed.ncbi.nlm.nih.gov/26487805>
41. Zoellner, L. A., Rothbaum, B. O., & Feeny, N. C. (2011). PTSD not an anxiety disorder? DSM committee proposal turns back the hands of time. *Depression and anxiety*, 28(10), 853-856. doi:10.1002/da.20899
42. Zhang, Y., Vaidya, N., Iyengar, U., Sharma, E., Holla, B., Ahuja, C. K., . . . The c, V. c. (2020). The Consortium on Vulnerability to Externalizing Disorders and Addictions (c-VEDA): an accelerated longitudinal cohort of children and adolescents in India. *Molecular Psychiatry*. doi:10.1038/s41380-020-0656-1
43. Bomysoad, R. N., & Francis, L. A. (2020). Adverse Childhood Experiences and Mental Health Conditions Among Adolescents. *The Journal of adolescent health : official publication of the Society for Adolescent Medicine*, 67(6), 868–870. <https://doi.org/10.1016/j.jadohealth.2020.04.013>
44. Kennedy E. (2009). Editorial: evaluating interventions in child mental health: the importance of care provider and contextual influences. *Clinical child psychology and psychiatry*, 14(2), 163–165. <https://doi.org/10.1177/1359104508100881>
45. Aboobaker, S., Jangam, K. V., Sagar, K. J. V., Amaresha, A. C., & Jose, A. (2019). Predictors of emotional and behavioral problems among Indian adolescents: A clinic-based study. *Asian Journal of Psychiatry*, 39, 104-109. doi:<https://doi.org/10.1016/j.ajp.2018.12.002>
46. Roberts, A. L., McLaughlin, K. A., Conron, K. J., & Koenen, K. C. (2011). Adulthood stressors, history of childhood adversity, and risk of perpetration of intimate partner violence. *American journal of preventive medicine*, 40(2), 128–138. <https://doi.org/10.1016/j.amepre.2010.10.016>

47. Koenig, M. A., Stephenson, R., Ahmed, S., Jejeebhoy, S. J., & Campbell, J. (2006). Individual and contextual determinants of domestic violence in North India. *American journal of public health*, 96(1), 132–138. <https://doi.org/10.2105/AJPH.2004.050872>

## Appendices

### Physical DV

|                  | Common Mental Disorders | Adjusted Odds Ratio without adversity frequency (95% confidence interval) | Adjusted Odds Ratio with adversity frequency (95% confidence interval) |
|------------------|-------------------------|---------------------------------------------------------------------------|------------------------------------------------------------------------|
| Physical DV      | <b>2.339</b>            | <b>2.095 (1.481, 2.965)</b>                                               | 1.169 (.717, 1.908)                                                    |
| Site             |                         | <b>1.122 (1.023, 1.231)</b>                                               | 1.098 (.980, 1.230)                                                    |
| Education Status |                         | <b>.316 (.197, .507)</b>                                                  | <b>.466 (.244, .892)</b>                                               |
| Gender           |                         | <b>.548 (.403, .745)</b>                                                  | <b>.503 (.329, .767)</b>                                               |
| ACEs - Frequency |                         |                                                                           | <b>.637 (.559, .726)</b>                                               |
|                  | Anxiety Disorders       | Adjusted Odds Ratio without adversity frequency (95% confidence interval) | Adjusted Odds Ratio with adversity frequency (95% confidence interval) |
| Physical DV      | <b>1.904</b>            | <b>1.809 (1.193, 2.743)</b>                                               | 1.577 (.897, 2.771)                                                    |
| Site             |                         | <b>1.191 (1.066, 1.331)</b>                                               | <b>1.172 (1.024, 1.341)</b>                                            |
| Education Status |                         | <b>.456 (.250, .830)</b>                                                  | <b>.423 (.197, .908)</b>                                               |
| Gender           |                         | <b>.495 (.345, .710)</b>                                                  | <b>.449 (.272, .740)</b>                                               |
| ACEs - Frequency |                         |                                                                           | <b>.787 (.673, .922)</b>                                               |
|                  | Depressive Disorders    | Adjusted Odds Ratio without adversity frequency (95% confidence interval) | Adjusted Odds Ratio with adversity frequency (95% confidence interval) |
| Physical DV      | <b>2.767</b>            | <b>2.278 (1.418, 3.661)</b>                                               | .642 (.315, 1.306)                                                     |
| Site             |                         | 1.055 (.928, 1.199)                                                       | 1.027 (.874, .1.207)                                                   |
| Education Status |                         | <b>.189 (.108, .332)</b>                                                  | .536 (.234, 1.229)                                                     |
| Gender           |                         | <b>.424 (.270, .667)</b>                                                  | <b>.428 (.236, .778)</b>                                               |
| ACEs - Frequency |                         |                                                                           | <b>.469 (.395, .558)</b>                                               |

### Psychological DV

|                  | Common Mental Disorders | Adjusted Odds Ratio without adversity frequency (95% confidence interval) | Adjusted Odds Ratio with adversity frequency (95% confidence interval) |
|------------------|-------------------------|---------------------------------------------------------------------------|------------------------------------------------------------------------|
| Psychological DV | 1.250                   | 1.145 (.843, 1.557)                                                       | .880 (.572, 1.354)                                                     |
| Site             |                         | <b>1.129 (1.028, 1.240)</b>                                               | 1.100 (.981, 1.233)                                                    |
| Education Status |                         | <b>.270 (.170, 1.240)</b>                                                 | <b>.451 (.234, .869)</b>                                               |
| Gender           |                         | <b>.537 (.394, .732)</b>                                                  | <b>.462 (.300, .711)</b>                                               |

|                  |                      |                                                                           |                                                                        |
|------------------|----------------------|---------------------------------------------------------------------------|------------------------------------------------------------------------|
| ACEs - Frequency |                      |                                                                           | <b>.620 (.545, .706)</b>                                               |
|                  | Anxiety Disorders    | Adjusted Odds Ratio without adversity frequency (95% confidence interval) | Adjusted Odds Ratio with adversity frequency (95% confidence interval) |
| Psychological DV | 1.129                | 1.073 (.747, 1.541)                                                       | 1.092 (.661, 1.802)                                                    |
| Site             |                      | <b>1.199 (1.072, 1.342)</b>                                               | <b>1.178 (1.027, 1.350)</b>                                            |
| Education Status |                      | <b>.394 (.218, 1.713)</b>                                                 | <b>.390 (.180, .843)</b>                                               |
| Gender           |                      | <b>.481 (.334, .692)</b>                                                  | <b>.414 (.248, .690)</b>                                               |
| ACEs - Frequency |                      |                                                                           | <b>.771 (.661, .901)</b>                                               |
|                  | Depressive Disorders | Adjusted Odds Ratio without adversity frequency (95% confidence interval) | Adjusted Odds Ratio with adversity frequency (95% confidence interval) |
| Psychological DV | <b>1.546</b>         | 1.317 (.857, 2.024)                                                       | .647 (.351, 1.193)                                                     |
| Site             |                      | 1.063 (.933, 1.210)                                                       | 1.027 (.873, 1.208)                                                    |
| Education Status |                      | <b>.163 (.094, .283)</b>                                                  | .550 (.236, 1.279)                                                     |
| Gender           |                      | <b>.427 (.270, .674)</b>                                                  | <b>.414 (.226, .758)</b>                                               |
| ACEs - Frequency |                      |                                                                           | <b>.465 (.392, .551)</b>                                               |

## Sexual DV

|                  |                         |                                                                           |                                                                        |
|------------------|-------------------------|---------------------------------------------------------------------------|------------------------------------------------------------------------|
|                  | Common Mental Disorders | Adjusted Odds Ratio without adversity frequency (95% confidence interval) | Adjusted Odds Ratio with adversity frequency (95% confidence interval) |
| Sexual DV        | <b>2.281</b>            | <b>1.862 (1.015, 3.415)</b>                                               | .714 (.304, 1.681)                                                     |
| Site             |                         | <b>1.110 (1.012, 1.217)</b>                                               | 1.098 (.980, 1.229)                                                    |
| Education Status |                         | <b>.283 (.177, .452)</b>                                                  | <b>.468 (.244, .899)</b>                                               |
| Gender           |                         | <b>.538 (.395, .732)</b>                                                  | <b>.499 (.327, .762)</b>                                               |
| ACEs - Frequency |                         |                                                                           | <b>.619 (.543, .704)</b>                                               |
|                  | Anxiety Disorders       | Adjusted Odds Ratio without adversity frequency (95% confidence interval) | Adjusted Odds Ratio with adversity frequency (95% confidence interval) |
| Sexual DV        | <b>2.353</b>            | <b>2.124 (1.087, 4.152)</b>                                               | 1.361 (.557, 3.325)                                                    |
| Site             |                         | <b>1.176 (1.052, 1.315)</b>                                               | <b>1.159 (1.012, 1.327)</b>                                            |
| Education Status |                         | <b>.421 (.231, .765)</b>                                                  | <b>.425 (.197, .921)</b>                                               |
| Gender           |                         | <b>.490 (.341, .705)</b>                                                  | <b>.446 (.270, .737)</b>                                               |
| ACEs - Frequency |                         |                                                                           | <b>.768 (.656, .898)</b>                                               |
|                  | Depressive Disorders    | Adjusted Odds Ratio without adversity frequency (95% confidence interval) | Adjusted Odds Ratio with adversity frequency (95% confidence interval) |

|                  |              |                          |                          |
|------------------|--------------|--------------------------|--------------------------|
| Sexual DV        | <b>2.802</b> | 2.170 (.982, 4.796)      | .366 (.107, 1.248)       |
| Site             |              | 1.042 (.919, 1.183)      | 1.041 (.886, 1.223)      |
| Education Status |              | <b>.173 (.099, .302)</b> | .518 (.227, 1.183)       |
| Gender           |              | <b>.402 (.256, .631)</b> | <b>.431 (.238, .780)</b> |
| ACEs - Frequency |              |                          | <b>.469 (.396, .555)</b> |
